# Supplementary figures and images for: Concomitant Use of Sulforaphane Enhances Antitumor Efficacy of Sunitinib in Renal Cell Carcinoma In Vitro
Source: MDPI journal article supplement (doi:10.3390/cancers14194643), 2022-09-24

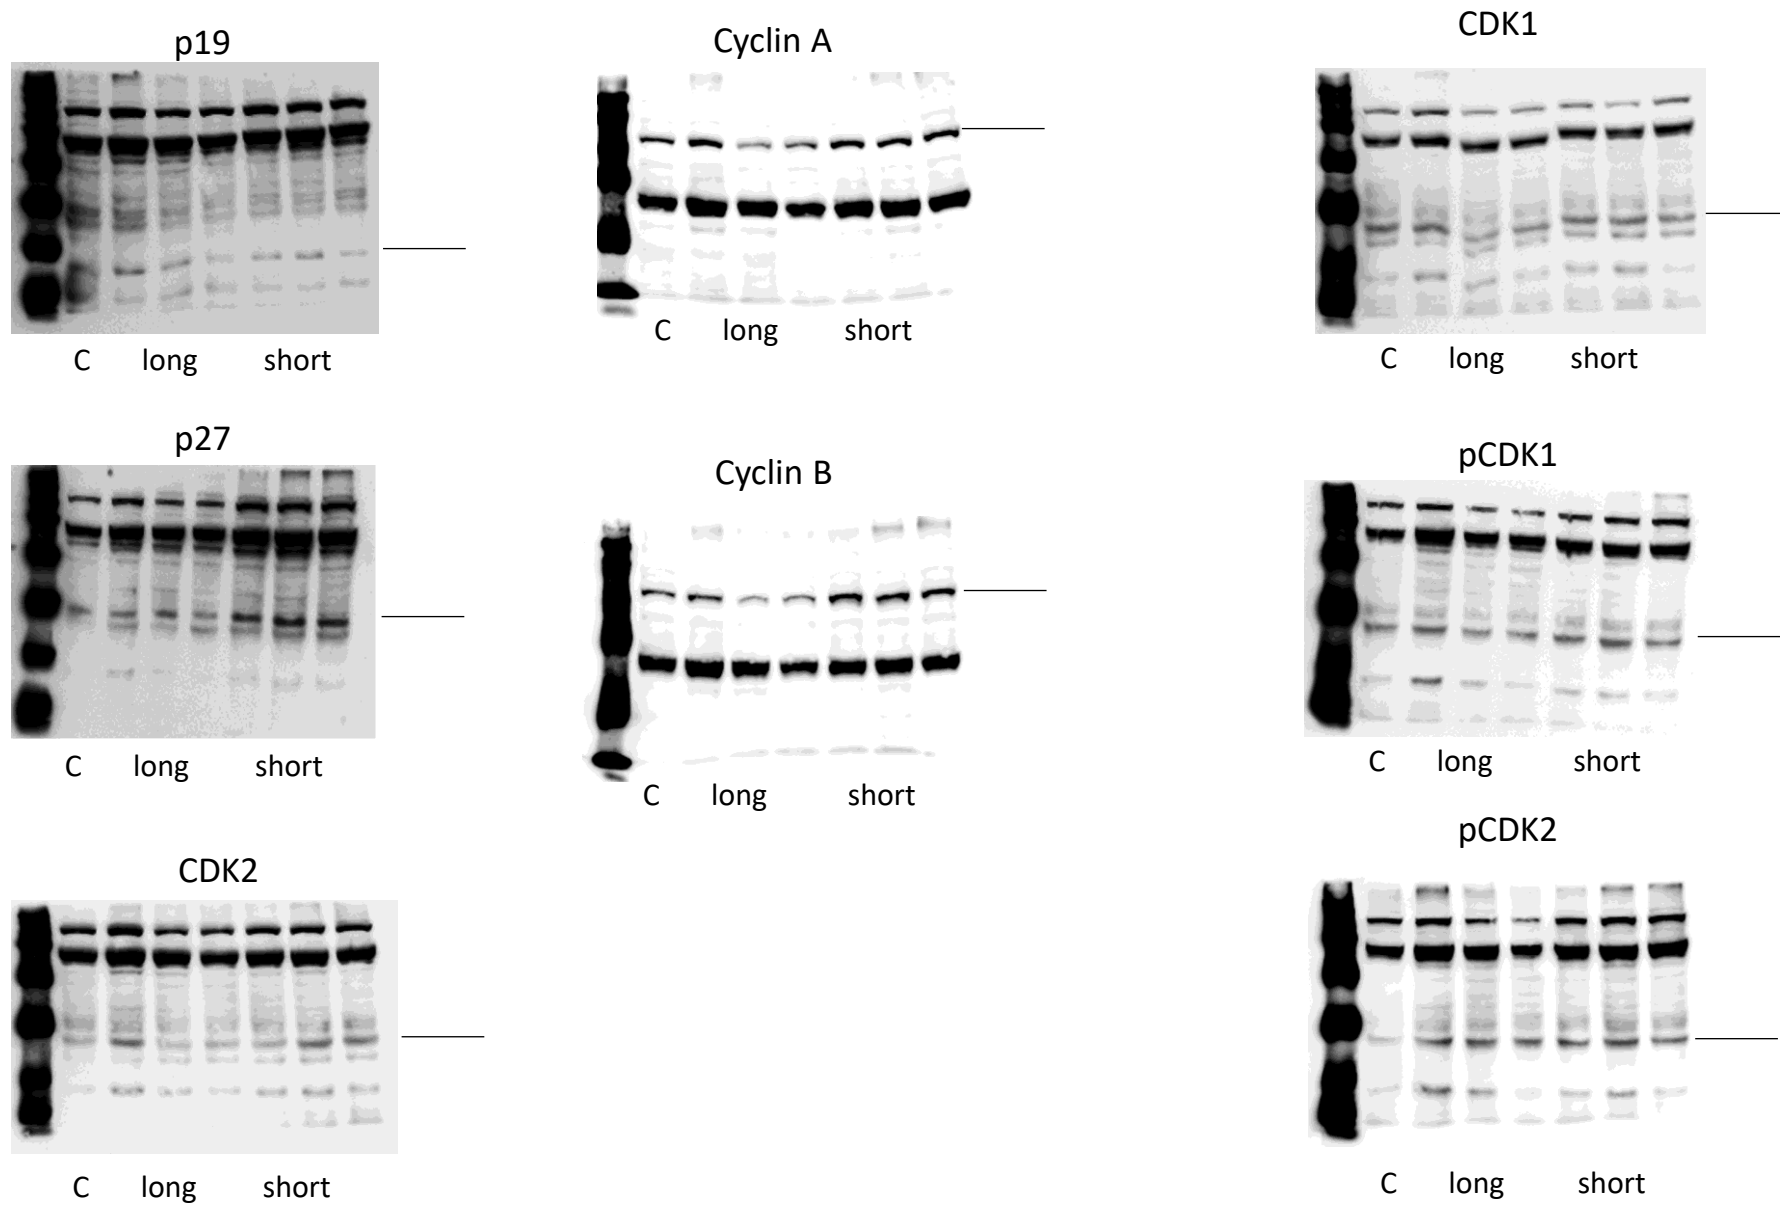

Figure S1: Original western blots.

Supplement: s1 [file s1]
